1 **Human activities influence the direction and magnitude of local biodiversity change over**  
2 **time**

3  
4 Jillian C Dunic<sup>1,2\*</sup>, Robin Elahi<sup>3\*</sup>, Marc J. S. Hensel<sup>1</sup>, Patrick J. Kearns<sup>1,4</sup>, Mary I. O'Connor<sup>5</sup>,  
5 Daniel Acuña<sup>1</sup>, Aaron Honig<sup>1</sup>, Alexa R. Wilson<sup>1</sup>, Jarrett E. K. Byrnes<sup>1</sup>  
6

7 <sup>1</sup>*Department of Biology, University of Massachusetts, Boston, Massachusetts 02125 USA*

8 `jdunic@gmail.com`

9 `mjshensel@gmail.com`

10 `daniel.acunahurta001@umb.edu`

11 `aaron.honig001@umb.edu`

12 `alexa.wilson001@umb.edu`

13 `jarrett.byrnes@umb.edu`

14 <sup>2</sup>*Department of Biology, Simon Fraser University, Burnaby, B.C. V5A 1S6 Canada*

15 <sup>3</sup>*Hopkins Marine Station, Stanford University, Pacific Grove, CA 93950 USA*

16 `elahi@stanford.edu`

17 <sup>4</sup>*Department of Marine and Environmental Science, Northeastern University Marine Science*

18 *Center, Nahant, MA 01908*

19 `kearns.p@husky.neu.edu`

20 <sup>5</sup>*Department of Zoology and Biodiversity Research Centre, University of British Columbia,*

21 *Vancouver, B.C. V6T 1Z4 Canada*

22 `oconnor@zoology.ubc.ca`

23  
24 \*Corresponding author - Email: `jdunic@gmail.com`  
25

26  
27  
28  
29  
30

31  
32  
33  
34  
35  
36

Manuscript Type: Standard Paper

Main Text Word Count:

Running headline:

37 **Abstract**

38

39 In recent decades, environmental drivers of community change have been associated with  
40 changes in biodiversity from local to global scales. Here we evaluate the role of anthropogenic  
41 drivers in marine ecosystems as drivers of change in local species richness with a meta-analysis  
42 of a novel dataset of temporal change in species richness. We paired biodiversity data from 144  
43 sites with large-scale drivers derived from geospatial databases: human cumulative impacts, sea  
44 surface temperature change, nutrient loading, and invasion potential. Three specific drivers  
45 (nutrient inputs, rate of linear temperature change, and non-native species invasion potential)  
46 explained patterns in local species richness change. We show that these drivers have opposing  
47 effects on biodiversity trends, and in some cases, contrasting directions of change can offset each  
48 other to yield observations of no net change across localities. Further, long-term studies reveal  
49 different effects of drivers that are not observed in short-term studies. These findings begin to  
50 explain high variability observed in species diversity trends at local scales. We suggest that local  
51 species diversity change is a predictable phenomenon and that observations of no net change  
52 across many time-series can be explained when the contrasting effects of human impacts are  
53 considered.

54

55

56

57 **Keywords:** global biodiversity change, human impacts, marine, coastal, attribution, meta-  
58 analysis

59 INTRODUCTION

60 Human impacts such as habitat destruction, pollution, and climate change have reduced global  
61 species diversity [1,2]. At the same time, local temporal trends in diversity are variable; synthetic  
62 assessments of marine and terrestrial diversity time-series have reported decreases, gains [3,4],  
63 and no net change in average species richness [5,6] over time at local scales (e.g., < 20 km<sup>2</sup>).  
64 Even more important than variation in average trends reported by each of these syntheses is the  
65 ‘within-synthesis’ variation in local biodiversity trends. That is, individual sites can exhibit  
66 species losses or gains [3,5,6]. Emphasis on global average trends in diversity obscures the  
67 regional or local scale processes that drive local change in richness [3].

68  
69 Human-mediated disturbances contribute to local species loss across terrestrial [2,7], aquatic [8],  
70 and marine environments [9,10]. However, to date, we lack studies that attribute local richness  
71 change over time to human drivers, instead using space-for-time substitutions (e.g., 2,7). Habitat  
72 change, overexploitation, and pollution negatively affect species at a local scale [11–14].  
73 Meanwhile, synergisms between multiple stressors can exacerbate community responses to  
74 human impacts [15,16]. However human impacts such as invasions and climate change can lead  
75 to local increases in diversity [17,18]. If multiple drivers interact or co-occur, the opposing  
76 effects of these different drivers of global change could result in observations of no net change.  
77 Given the broad range of human impacts and the variability of community responses, it is not  
78 surprising that the findings of recent syntheses of local diversity change have been equivocal,  
79 especially since few of them have considered this variability in the context of human impacts [3].

80

81 High variability in diversity trends across many time-series underlies recent estimates of no  
82 average change in species richness. For example, the rates of species richness change in Vellend  
83 [5], which concluded no net change in species richness, ranged from losses of 8% per year to  
84 gains of 35% per year. Elahi [3], found more increases in richness over time than decreases,  
85 based on reported species losses that ranged from 5% per year to gains of 6.3% per year, and  
86 much of this variation was attributable to human drivers. This variability in observed patterns of  
87 diversity change and knowledge that human impacts affect local-scale diversity [2,3,7] suggests  
88 a need for a framework that explicitly identifies how environmental and human impacts will  
89 shape long-term changes in local-scale biodiversity. Here we attempt to attribute local changes in  
90 species richness to human impacts for a new synthesis of species diversity over time in marine  
91 coastal communities.

92  
93 Coastal communities worldwide are subjected to a range of different human impacts [19]. We  
94 hypothesize that cumulative human impacts are likely to reflect additive stresses and thus have a  
95 negative effect on local species richness [16]. However, cumulative impacts are composed of  
96 many individual drivers that could mask each other's signal. We quantify how a combination of  
97 the human impacts—nutrient addition, shipping traffic, and rate of temperature change—affect  
98 species richness change in marine communities at a local/site level. Nutrient addition can  
99 negatively affect local richness by degrading habitat [20,21] but can also increase productivity,  
100 and consequently total abundance and therefore diversity. Shipping traffic facilitates species  
101 invasions and can lead to gains or offset local losses by introducing new species [22]. Increased  
102 temperatures could lead to species range expansions yielding local gains of warm water species  
103 [23–25]. Last, we expect the effect of drivers on diversity can change over time [26]. Thus, we  
104 examined how study duration to moderates the effect of drivers. To address these hypotheses, we

105 collated studies that have measured species richness from sites across marine biomes and  
106 leverage the available variation in global drivers to put our analysis in an ecological context. We  
107 find that variation in local-scale biodiversity change is related to the influence of human impacts  
108 such as climate change, invasions, and eutrophication.

109

## 110 METHODS

111

### 112 **Study Selection**

113 We performed a systematic search of the literature using Web of Science and the Aquatic  
114 Commons database, which included grey literature publications. Additional grey literature  
115 publications were extracted from Elahi [3], which was published after our initial search. We  
116 searched for studies that had resampled marine species richness or diversity at a minimum of two  
117 time points equal to or greater than one year apart. Our literature search terms were adapted from  
118 Vellend [5] with keywords to target marine habitats while excluding freshwater or terrestrial  
119 habitats: e.g., ‘marine’ OR ‘ocean’ NOT (‘freshwater’ OR ‘terrestrial’), and combining these  
120 with keywords about biodiversity and resampling: (‘biodiv\*’ OR ‘divers\*’ OR ‘richness’) AND  
121 ‘resamp\*’ (See full search string in supplementary materials S1). We initially entered the search  
122 terms into the Web of Science and Aquatic Commons databases on February 19, 2014. This  
123 search returned 4803 references, which we filtered down to 745 papers after reviewing titles,  
124 abstracts, and full text where necessary, to identify studies that met the following criteria:  
125 sampled marine taxa, reported biodiversity, and resampled sites with at least one year between  
126 initial and final sampling points (figure S1). From the remaining 745 papers, we excluded studies  
127 if sampling methods were inconsistent between time points, if rare species were not included, or  
128 if *a priori* events were described by authors as affecting a site (see supplementary materials S2).

129 After study selection we had data from 144 sites from 35 studies around the world (figure S2).  
130 Although we collected data for abundances (sites = 22) and Shannon diversity (sites = 40), the  
131 number of samples and the limited range of variation in drivers were insufficient for us to  
132 examine in the context of human drivers. Therefore, we discuss only results of local species  
133 richness change.

134

135

136

### 137 **Data Acquisition**

138 We extracted 13 variables that described taxonomic group, sampling method, number of  
139 replicates, number of subsamples, plot size, and richness. In most studies, raw species abundance  
140 data were not provided and so data were extracted as summary statistics from figures using  
141 WebPlotDigitizer 3.10 [27] or manually extracted from data tables. Wherever possible, sampling  
142 errors from summary statistics were collected so that we could perform a variance-weighted  
143 meta-regression. When a site was sampled between a range of years (e.g., 1995 – 1996), the first  
144 year was recorded for consistency. When only a season or range of months was given, the  
145 average month of that season was recorded. When studies explicitly stated that an event had  
146 occurred (e.g., Marine Protected Area implemented, resource extraction, construction) they were  
147 excluded from the analysis. We calculated the effect size as the log response ratio (LRR) of the  
148 proportion of species richness change between a final and initial time point (eqn. 1).

149

150  $LRR = \ln(\text{Final richness} / \text{Initial richness})$  (eqn. 1)

151

152 We chose to use the LRR instead of Hedges's D, another commonly used metric of effect size,  
153 because log transformation of the response ratio normalizes the data and because we can use the  
154 following equation to convert the LRR into the percent change in species richness (eqn. 2).

155

156 % change in species richness =  $100 * (e^{\text{LRR}} - 1)$  (eqn. 2)

157

158 We verified assumptions of normality of residuals for all fit models using visual inspection of  
159 standardized residuals and their quantiles. To check for potential publication bias in effect sizes,  
160 we visually inspected funnel plots. However, publication bias in our dataset was unlikely as  
161 many of our studies (46%) were not testing for changes in biodiversity over time. For a complete  
162 list of studies used in the analysis see electronic supplementary materials S5.

163

#### 164 **Driver data**

165 To examine the effect of human impacts on the change in species richness over time, we used  
166 components of the cumulative human impacts (CHI) data created by Halpern [28]. The CHI  
167 model summarizes data on a broad set of human impacts for every square kilometer of the  
168 world's oceans. Impact scores are derived from a model that integrates global data for 19  
169 different drivers including nutrient pollution, fishing, urban runoff, shipping traffic, and sea  
170 surface temperature anomalies [28]. The CHI model is a potential indicator of human impacts;  
171 however, this model incorporates the effects of multiple drivers that may have opposing effects  
172 on local species diversity. To understand the effects of specific drivers on local-scale species  
173 richness change, we extracted data layers that had global coverage and that were expected to  
174 affect local richness in coastal areas. We used two data layers used in the CHI data: non-native  
175 species invasion potential (metric tonnes of cargo shipped to a port in 2011 was used as a proxy



176 for invasion potential) and nutrient addition (metric tonnes of nitrogen and phosphorous fertilizer  
177 use as reported by the FAO from 2007 – 2010, was used as an indication of intensity of nutrient  
178 addition along coastal areas; See [19,28] for details). We also calculated the decadal rate of  
179 linear temperature change (LTC) using the Met Office Hadley Centre Sea Surface Temperature  
180 data [29]. For each study, we collected the latitude and longitude of sampling points for all plots  
181 surveyed in a study. When study sites were composed of multiple subsamples, we included all  
182 the associated coordinates. Data from the spatial layers were then extracted from these  
183 coordinates. When a site was comprised of multiple coordinates, we computed the average  
184 impact value for each site.

185

## 186 **Statistical analysis**

187 To examine whether marine richness has changed at local scales and to test whether cumulative  
188 human impacts and specific drivers affect changes in local species richness, we performed three  
189 variance-weighted random effects meta-regressions using the package *metafor* [30] in the  
190 statistical software R version 3.4.0 [31]. We included a random effect of study, as single studies  
191 could contain multiple sites. This approach allowed us to account for variation between studies  
192 due to factors such as differences in researcher methods, taxonomic groups, and sites. All code  
193 for analysis is available at <https://github.com/jdunic/local-marine-meta>.

194

195 To test explicit drivers and to determine the average rate of change in local species richness we  
196 tested three models: the average change in local richness (eqn. 3), the effect of cumulative  
197 human impacts on local richness change (eqn. 4), and the effect of specific drivers on local  
198 richness change (eqn. 4). We used the model heterogeneity statistic  $Q_m$  to determine whether our  
199 models explained a significant amount of variability observed in the data. We first examined the

200 average rate of change in species richness from our data set using the following model for site  $i$   
201 from study  $j$

202

203

$$LRR_{ij} = \alpha_j + \beta_D Duration_i + e_i$$

204

$$\alpha_j \sim N(0, \sigma_j)$$

$$e_i \sim N(0, \sigma_i)$$

205 (eqn. 3)

206

207 Where  $\alpha_j$  is the between-study random effects (estimated by the model) and  $\sigma_i$  was the measured  
208 variance of a richness estimate at site  $i$ . We used study duration as a predictor of the LRR to  
209 estimate a rate of change rather than use LRR/Duration as a response variable to increase the  
210 power of our analyses. To then evaluate the effects of different drivers, we used a general model  
211 for incorporating  $k$  drivers (eqn. 4).

212

213

$$LRR_{ij} = \alpha_j + \beta_D Duration_{ij} + \sum_{k=1}^n (\beta_k Driver_{ijk}) + \sum_{k=1}^n (\beta_{k2} Driver_{ijk} Duration_{ij}) + e_i$$

214

$$\alpha_j \sim N(0, \sigma_j)$$

$$e_i \sim N(0, \sigma_i)$$

215 (eqn. 4)

216

217 Including duration in our analysis allowed us to account for differences observed between short-  
218 term and long-term studies by comparing the rate of change of richness as it varies by study  
219 duration ( $\beta_D$ ) with the average effect of a driver on the rate of change of species richness ( $\beta_k$ ) and  
220 the average effect of a driver on the rate of change of richness as moderated by study duration  
221 ( $\beta_{k2}$ ). For example, a positive value for the coefficient  $\beta_{k2}$ , would be interpreted as the driver  
222 slowing the rate of loss or increasing the rate of gain, depending on the sign of rate of change  $\beta_D$ .  
223 We used the Akaike Information Criterion corrected for small sample sizes (AICc) to compare  
224 models and determine whether inclusion of human impacts improved the predictive ability of the  
225 model relative to the model that included only study duration.

226 To determine whether any single study had a disproportionate effect on parameter estimates we  
227 systematically re-ran the meta-analysis excluding data from one study at a time to test the  
228 robustness of our analyses to outliers in the data (i.e., leave-one-out analyses). We used variance  
229 weighting in our analysis because it increases the power to detect differences from zero by  
230 placing higher values on studies for which estimates are more precise [32]. Although using an  
231 unweighted or sample-size weighted analysis would increase the studies included in our  
232 analyses, the parameter estimates from these methods are unreliable (figure S4). For  
233 completeness, however, we present these results along with their robustness to the exclusion of  
234 single studies using both method (supplementary materials S3, S4, figures S5-S9, tables S5 –  
235 S8).

236

237 **Taxonomic groups**

238 We expect that there will be differences in rates of richness change across taxonomic groups in  
239 response to different stressors [7,33]. Therefore, in addition to testing the effect of global drivers  
240 of change on local richness change, we subset the data by taxonomic group. For each taxonomic  
241 group we had insufficient sample size to test the effect of multiple global drivers on local  
242 richness change. Therefore, we present only results for the mean rate local richness change  
243 without considering human impacts and the effect of cumulative human impact values on the rate  
244 of local richness change for different taxonomic groups.

245

246

## 247 RESULTS

248

### 249 **Local richness change**

250 In general, inferences on the rate of change of species richness depend on the inclusion of human  
251 impacts. Within our dataset, both models that included some form of human impacts performed  
252 better than the model that did not include human impacts (table 1). In our model that did not  
253 consider human impacts, study duration influenced observed change in species richness ( $Q_m =$   
254 5.12,  $p = 0.024$ ) and we found that the average log rate of change in species richness per year  
255 was 0.01 (95% CI = 0.002 - 0.021,  $p = 0.022$ ), which corresponds to species richness gains at a  
256 rate of 1.05% per year (figure 1a, table S1). When we included cumulative human impacts and  
257 specific drivers in our models, the mean estimated log rate of change in species richness changed  
258 over study duration. For example, when cumulative human impacts were zero (i.e., the duration  
259 effect in Fig. 1b), the observed rate of change in species richness was -3.2% (95% CI = -5.4% –  
260 (-1.1)%,  $p = 0.004$ , table S1) per year and when all specific driver values were zero (i.e., the

261 duration effect in figure 2), the observed rate of change in species richness was 1.7% (95% CI =  
262 0.19% – 3.3%,  $p = 0.027$ , table S1) per year.

263  
264 Cumulative human impacts accounted for a significant proportion of the heterogeneity observed  
265 in our dataset ( $Q_m = 45.3$ ,  $p < 0.001$ ), but the signs of results were unexpected. There was weak  
266 evidence for negative effects of cumulative human impact values on the species richness from  
267 short-term studies (i.e., the CHI effect in figure 1*b*), with an associated decline in species  
268 richness of -4.6% per unit of cumulative human impact value (95% CI = -9.6% - 0.6%,  $p =$   
269 0.081; table S1). However, over the long term (impact \* duration interaction in figure 1*b*), each  
270 unit increase in cumulative impact value decreased the rate of species loss per year by 0.86% /  
271 (year \* impact score) (95% CI = 0.5% - 1.3%,  $p = < 0.001$ ; table S1).

272  
273 Different drivers had opposing effects on local richness change when we accounted for nutrient  
274 addition, invasion potential, and rate of linear temperature change in our models ( $Q_m = 60.3$ ,  $p <$   
275 0.001, figure 2, 3, table S1). Nutrient addition alone was associated with increases in local gains  
276 of richness at a rate of 1.3% per tonne of nutrients / km<sup>2</sup> (95% CI = 0.4% - 2.2%,  $p = 0.007$ , table  
277 S1). Similarly, rate of linear temperature change was also associated with gains (6% increase per  
278 °C / decade, 95% CI = 1% – 11%,  $p = 0.018$ , table S1). Conversely, there was weak evidence for  
279 negative effects of invasion potential (-1.4% per 1000 tonnes of shipping cargo, 95% CI = 0.4% -  
280 2.3%,  $p = 0.066$ , table S1). However, when we considered the effect of these drivers over time  
281 ( $\beta_{\text{Duration*Driver}}$ ), the effect of each driver on local richness was reversed (i.e., the Duration:Driver  
282 effect in figure 2*b*). Nutrient addition and rate of linear temperature change negatively affected  
283 the rate of species richness change over time, while invasive propagule pressure positively  
284 affected the rate of species richness change over time (table S1). Figure 3 illustrates the expected

285 effects of nutrients, invasive propagule pressure, and rate of linear temperature change (when set  
286 to the maximum values observed in our data) on the rate of species richness change over time  
287 compared to a baseline rate of change (1.7% per year) when the three driver values are zero. The  
288 observed net effect of richness change, when all drivers were set to the maximum values  
289 observed in our dataset (figure 3d), shows a much smaller effect size over time compared to any  
290 individual driver. This suggests that opposing effects of local drivers can result in observations  
291 of little to no change in global averages of local richness change.

292

### 293 **Taxonomic groups**

294 Responses to changes in local richness may vary depending on the subset of the community  
295 examined. Our dataset included nine different taxonomic groups, five of which had three or more  
296 sites sampled (table S2). When impacts were not considered, we found gains in local richness at  
297 an average rate of 5.5% per year in algal assemblages and gains at a rate of 8.1% per year in  
298 invertebrate assemblages (figure 4) in the context of our dataset. Like the aggregated dataset, the  
299 inclusion of cumulative human impacts (table S3) generally improved model performance (table  
300 S4) when we considered taxonomic groups separately. Unfortunately, sample sizes were  
301 insufficient to test for the effects of drivers on local richness change across taxonomic groups.

302

### 303 **Data coverage**

304 With respect to global representativeness of impact levels, we had more observations of species  
305 richness change over time than expected in intermediate levels of nutrient addition and invasion  
306 potential compared to the distribution of these two drivers when considered from coastal areas  
307 globally (figure S10a,b). Meanwhile, the cumulative human impact values ranged from 0.89 –  
308 8.9 in our analysis, compared to minimum and maximum global values of 0 to values greater

309 than 15. Similar to the specific drivers, the majority of our sites showed moderate impact. Fifty  
310 percent of our studies were in regions/pixels with cumulative human impact values between 2.7  
311 and 5.1. Across taxonomic groups our data were limited to algae, fish, and invertebrate  
312 communities, or some combination of these taxonomic groups (mixed). Meanwhile, temporally,  
313 eighty percent of studies were 15 years or less in duration and started after 1990.

314

## 315 DISCUSSION

316

317 Our meta-analysis suggests that local context of human impacts is necessary to understand the  
318 high variability observed in long-term change in local species richness. Specifically, local drivers  
319 (nutrients, invasion potential, and the rate of linear temperature change) can have opposing  
320 effects on local changes in species richness. These opposing effects can interact such that the net  
321 change in local species richness can be close to zero when multiple drivers are acting on a  
322 community, as illustrated in figure 5d. As expected, when we considered cumulative human  
323 impacts, we found weak evidence for negative effects on local richness change. But over time,  
324 contrary to expectations, we found that cumulative human impacts were correlated with local  
325 gains in richness. This was unexpected given research showing that cumulative stressors  
326 typically have a negative effect on local communities [16,34]. However, the cumulative human  
327 impacts are an aggregate metric of human impact meaning that observed relationships between  
328 local scale richness change and high impacts may be driven by whatever individual driver is  
329 most important at a given location. Our results, which indicate differences in the direction of  
330 change in local species richness change due to specific drivers, suggest a need to apply  
331 ecological theory about individual drivers of species richness at a local scale to the entire planet

332 to generate *a priori* predictions of when and where we should observe increases or decreases in  
333 biodiversity.

334

### 335 **Nutrients**

336 We found that, while sites associated with high nutrient run-off were associated with short-term  
337 gains in species richness, over the long-term, sites with high nutrient run-off were correlated with  
338 losses (figures 2, 3). Nutrient addition has been shown to increase primary production [35] and  
339 richness [36] in macroalgae and may be, in part, responsible for the increase in algal richness that  
340 we observed (figure 4). However, the processes that drive effects of nutrient addition on local  
341 communities can be complex and depend on factors such as the level of addition [37], species  
342 interactions [38], and dependent on time [39]. Most nutrient addition studies in marine systems  
343 occur over a short time frame (e.g., 40,44,45), but Kraufvelin [39] found that it could take five  
344 years before significant changes in canopy composition of rocky shore macroalgae are observed.  
345 Meanwhile in terrestrial systems, long-term studies in grasslands have also revealed that nitrogen  
346 addition can result in species losses over time [42]. Our results suggest that nutrient addition is  
347 an important driver of local richness change and that in the long-term nutrient enrichment can  
348 decrease rates of local richness change. Given the dynamics of coastal systems, this might even  
349 be more important in estuarine systems where water exchange is low relative to the open coast.  
350

### 351 **Invasions**

352 We found that in the short-term, there was weak evidence that invasion potential may be  
353 associated with species richness losses, but in the long-term, high invasion potential was  
354 associated with local gains in species richness. Invasions can augment local species gains if new-  
355 invaders can facilitate potential future invaders [43] through mechanisms such as habitat change



356 [33,44]. Our finding that long-term gains in species richness are associated with high shipping  
357 traffic is consistent with predictions made by Drake [45] and Sax [46]. Elahi [3] also found an  
358 average increase in local species richness in coastal marine communities over time, particularly  
359 for low trophic levels. When we considered separate taxonomic groups we found substantial  
360 increases in both the invertebrate and algal communities, which is consistent with the type of  
361 invaders that are transported by shipping traffic through ballast waters and organisms attached to  
362 ship hulls [44]. Furthermore, our findings of increased richness of lower trophic levels are  
363 consistent with expectations of long-term gains in richness of primary consumers in marine  
364 systems[47]. This suggests that more detailed context, such as taxonomic group or trophic level,  
365 could be necessary to understand patterns of local richness change and the effect of propagule  
366 pressure on local richness change.

367

368

### 369 **Temperature**

370 Similar to the effects of nutrients on local richness, negative or low values of rate of linear  
371 temperature change were associated with short-term gains but increases in the rate of  
372 temperature change were associated with local species losses (figure 2). Further this result did  
373 not appear to be strongly influenced by any one study. Our observation of short-term gains and  
374 long-term losses might reflect situations where warm water species move into areas that were  
375 previously at cooler temperatures at a rate that is faster than the emigration or extinction of  
376 resident species [48,49]. For example, within the studies included in our analysis, the movement  
377 of warm water fishes into areas that had previously cooler water temperatures was found in two  
378 of eleven studies examining fish communities (e.g., 53,54). Therefore, it is important to consider  
379 long-term trends in species richness as gains due to species range expansions or species

380 introductions could offset local losses. In a meta-analysis to examine the effects of human  
381 impacts on local species richness, Murphy [7] found that increased temperature was not a  
382 significant moderator of richness in producer and ectotherm communities yet the majority of  
383 studies included in Murphy [7] were less than three years in duration.

384

### 385 **Relationship to the ongoing debate on trends in local species diversity**

386 Broadly, our results urge caution in the interpretation of the literature on average trends in local  
387 scale biodiversity without considering local context. First, as with previous syntheses, we  
388 identified additional geographical biases in our dataset similar to those identified in terrestrial  
389 systems and in other recent syntheses of local diversity change [2,3,5,6]. Specifically, South  
390 America, Africa, Asia, and Antarctica were underrepresented. Biases of sampled sites may limit  
391 the ability to extrapolate the trends observed in our synthesis to the global scale if our dataset  
392 contains a non-representative distribution of impacts relative to all marine coastal diversity on  
393 the planet. The prevalence of drivers in our dataset differed from their global representation  
394 (figure S10). If the same is true of other recent analyses (e.g., [3,5,6]), the inference of average  
395 trends in species richness could reflect spatial biases in the distribution of drivers in the datasets  
396 of these studies rather than a true global average. Recent syntheses of hundreds of space-for-time  
397 analyses report that land-use change, invasive species, nutrient addition, and habitat change are  
398 associated with declines in local-scale species richness [2,7]. When these results are translated to  
399 global maps of impacts, they suggest that richness change in terrestrial systems should be  
400 negative, on average [2]. Our results begin to attribute the magnitude and sign of local-scale  
401 species richness change to specific human impacts. Further, our results show that specific human  
402 drivers can have antagonistic effects on local richness change. We suggest a need to develop an  
403 understanding of the current and future distribution of drivers, including ones not explicitly

404 considered in this study, to understand local species richness change across the world's oceans.

405 We conclude that examinations of change in biodiversity that come from non-representative

406 samples must either take drivers into account or restrict inferences to the biogeographic regions

407 considered. This point is essential whether an analysis focuses on either temporal analysis or

408 space-for-time substitutions.

409

## 410 CONCLUSION

411 How global increases in species extinction rates are being manifest at local scales is of immense

412 concern to basic and applied ecological research. Our analysis shows that local context of human

413 drivers explains some of the high variability observed in trends in local species richness.

414 Knowledge of specific drivers of local richness change such as invasion potential, nutrient

415 addition, and temperature change help predict changes in local scale richness. Our results

416 combined with others [2,3,7] suggest that to discern meaningful patterns of biodiversity change,

417 we must have some knowledge of local context (e.g., recent disturbances, geographic position

418 and context of human impacts, focal taxonomic group). We provide further context to the recent

419 results that have suggested no net change in species richness at local scales, showing that

420 multiple human impacts can contrast with each other with respect to species richness. We

421 suggest that species richness change at local scales in coastal marine environments is an

422 understandable and predictable phenomenon. To truly understand the future of local biodiversity

423 in the world's oceans, we suggest combining decades of hard-won understanding of community

424 ecology with new global assessments of human impacts across our seas. With these tangible,

425 testable predictions in hand, we can begin to plan for the oceans of the anthropocene.

426

427

428 **Data accessibility**

429

430 Data will be stored in the Knowledge Network for Biocomplexity (KNB) repository. Associated

431 R scripts will be archived with the data as well as via github and referenced using a Zenodo DOI.

432

433

434 **Competing interests**

435 We have no competing interests

436

437 **Author contributions**

438 JD and JB conceived of the study and study design. All authors contributed to data collection. JD

439 managed the database and carried out the statistical analysis. JD and JB wrote the initial draft of

440 the manuscript. All authors revised the manuscript.

441

442

443

444 **Acknowledgments**

445

446 We would like to thank I. Myers-Smith, R. Etter and R. Stevenson, A.J. Haupt and E. Hertz for

447 constructive comments on earlier versions of this manuscript. We thank T. Ingty for their

448 assistance with data collection.

449

450 **Funding**

451

452 We are also grateful for the financial support from MIT SeaGrant (2014-R/ RCM-36 JCD and  
453 MJSH), NatureServe (JD) and the University of Massachusetts (JD, MJSH, PK).

454

#### 455 **Literature Cited**

- 456 1. Vié J-C, Hilton-Taylor C, Stuart S. 2008 *Wildlife in a changing world - An analysis of the*  
457 *2008 IUCN red list of threatened species*. Gland, Switzerland: IUCN.  
458 (doi:10.2305/IUCN.CH.2009.17.en)
- 459 2. Newbold T *et al.* 2015 Global effects of land use on local terrestrial biodiversity. *Nature*  
460 **520**, 45–50. (doi:10.1038/nature14324)
- 461 3. Elahi R, O’Connor MI, Byrnes JEK, Dunic J, Eriksson BK, Hensel MJS, Kearns PJ. 2015  
462 Recent trends in local-scale marine biodiversity reflect community structure and human  
463 impacts. *Curr. Biol.* **25**, 1938–1943. (doi:10.1016/j.cub.2015.05.030)
- 464 4. Schipper AM *et al.* 2016 Contrasting changes in the abundance and diversity of North  
465 American bird assemblages from 1971 to 2010. *Glob. Chang. Biol.* , 1–12.  
466 (doi:10.1111/gcb.13292)
- 467 5. Vellend M, Baeten L, Myers-Smith IH, Elmendorf SC, Beauséjour R, Brown CD, De  
468 Frenne P, Verheyen K, Wipf S. 2013 Global meta-analysis reveals no net change in local-  
469 scale plant biodiversity over time. *Proc. Natl. Acad. Sci.* **110**, 19456–9.  
470 (doi:10.1073/pnas.1312779110)
- 471 6. Dornelas M, Gotelli NJ, McGill B, Shimadzu H, Moyes F, Sievers C, Magurran AE. 2014  
472 Assemblage time series reveal biodiversity change but not systematic loss. *Science (80-. )*.  
473 **344**, 296–299. (doi:10.1126/science.1248484)
- 474 7. Murphy GEP, Romanuk TN. 2013 A meta-analysis of declines in local species richness  
475 from human disturbances. *Ecol. Evol.* **4**, 91–103. (doi:10.1002/ece3.909)
- 476 8. Lake PS *et al.* 2000 Global change and the biodiversity of freshwater ecosystems: impacts  
477 on linkages between above-sediment and sediment biota. *Bioscience* **50**, 1099–1107.  
478 (doi:10.1641/0006-3568(2000)050[1099:gcatbo]2.0.co;2)
- 479 9. Dulvy NK, Sadovy Y, Reynolds JD. 2003 Extinction vulnerability in marine populations.  
480 *Fish Fish.* **4**, 25–64. (doi:10.1046/j.1467-2979.2003.00105.x)
- 481 10. Sala E, Knowlton N. 2006 Global marine biodiversity trends. *Annu. Rev. Environ. Resour.*  
482 **31**, 93–122. (doi:Doi 10.1146/Annurev.Energy.31.020105.100235)
- 483 11. Jones GP, McCormick MI, Srinivasan M, Eagle J V. 2004 Coral decline threatens fish  
484 biodiversity in marine reserves. *Proc. Natl. Acad. Sci.* **101**, 8251–8253.  
485 (doi:10.1073/pnas.0401277101)
- 486 12. Jackson JB *et al.* 2001 Historical overfishing and the recent collapse of coastal  
487 ecosystems. *Science* **293**, 629–37. (doi:10.1126/science.1059199)
- 488 13. Lotze HK *et al.* 2006 Depletion, degradation, and recovery potential of estuaries and  
489 coastal seas. *Science (80-. )*. **312**, 1806–1809. (doi:10.1126/science.1128035)
- 490 14. Johnston EL, Roberts DA. 2009 Contaminants reduce the richness and evenness of marine  
491 communities: A review and meta-analysis. *Environ. Pollut.* **157**, 1745–1752.

- 492 (doi:10.1016/j.envpol.2009.02.017)
- 493 15. Brook BW, Sodhi NS, Bradshaw CJA. 2008 Synergies among extinction drivers under  
494 global change. *Trends Ecol. Evol.* **23**, 453–460. (doi:10.1016/j.tree.2008.03.011)
- 495 16. Crain CM, Kroeker K, Halpern BS. 2008 Interactive and cumulative effects of multiple  
496 human stressors in marine systems. *Ecol. Lett.* **11**, 1304–1315. (doi:10.1111/j.1461-  
497 0248.2008.01253.x)
- 498 17. Sax DF, Gaines SD, Brown JH. 2002 Species invasions exceed extinctions on islands  
499 worldwide: a comparative study of plants and birds. *Am. Nat.* **160**, 766–783.  
500 (doi:10.1086/343877)
- 501 18. Menéndez R, Megías AG, Hill JK, Braschler B, Willis SG, Collingham Y, Fox R, Roy  
502 DB, Thomas CD. 2006 Species richness changes lag behind climate change. *Proc. R. Soc.*  
503 *London, Ser. B* **273**, 1465–1470. (doi:10.1098/rspb.2006.3484)
- 504 19. Halpern BS *et al.* 2008 A global map of human impact on marine ecosystems. *Science*  
505 (80-. ). **319**, 948–52. (doi:10.1126/science.1149345)
- 506 20. Gough L, Osenberg CW, Gross KL, Collins SL. 2000 Fertilization effects on species  
507 density and primary productivity in herbaceous plant communities. *Oikos* **89**, 428–439.  
508 (doi:10.1034/j.1600-0706.2000.890302.x)
- 509 21. Conley DJ, Carstensen J, Ærtebjerg G, Christensen PB, Dalsgaard T, Hansen JLS,  
510 Josefson AB. 2007 Long-term changes and impacts of hypoxia in Danish coastal waters.  
511 *Ecol. Appl.* **17**, 165–184. (doi:10.1890/05-0766.1)
- 512 22. Lockwood JL, Cassey P, Blackburn T. 2005 The role of propagule pressure in explaining  
513 species invasions. *Trends Ecol. Evol.* **20**, 223–228. (doi:10.1016/j.tree.2005.02.004)
- 514 23. Barry JP, Baxter CH, Sagarin RD, Gilman SE. 1995 Climate-related, long-term faunal  
515 changes in a California rocky intertidal community. *Science (80-. ).* **267**, 672–675.
- 516 24. Sorte CJB, Williams SL, Carlton JT. 2010 Marine range shifts and species introductions:  
517 Comparative spread rates and community impacts. *Glob. Ecol. Biogeogr.* **19**, 303–316.  
518 (doi:10.1111/j.1466-8238.2009.00519.x)
- 519 25. Burrows MT *et al.* 2014 Geographical limits to species-range shifts are suggested by  
520 climate velocity. *Nature* **507**, 492–5. (doi:10.1038/nature12976)
- 521 26. Gonzalez A *et al.* 2016 Estimating local biodiversity change: A critique of papers  
522 claiming no net loss of local diversity. *Ecology* **97**, 1949–1960. (doi:10.1890/15-1759.1)
- 523 27. Rohatgi A. 2016 WebPlotDigitizer.
- 524 28. Halpern BS *et al.* 2015 Spatial and temporal changes in cumulative human impacts on the  
525 world’s ocean. *Nat. Commun.* **6**, 7615. (doi:10.1038/ncomms8615)
- 526 29. Rayner NA, Parker DE, Horton EB, Folland CK, Alexander L V., Rowell DP, Kent E,  
527 Kaplan A. 2003 Global analyses of sea surface temperature, sea ice, and night marine air  
528 temperature since the late nineteenth century. *J. Geophys. Res.* **108**, 4407.  
529 (doi:10.1029/2002JD002670)
- 530 30. Viechtbauer W. 2010 Conducting Meta-Analyses in R with the metafor Package. *J. Stat.*  
531 *Softw.* **36**, 1–48. (doi:10.1103/PhysRevB.91.121108)
- 532 31. R Core Team. 2017 R: A language and environment for statistical computing.

- 533 32. Lajeunesse MJ. 2013 Power statistics for meta-analysis: tests for mean effects and  
534 homogeneity. In *Handbook of meta-analysis in ecology and evolution* (eds J Koricheva, J  
535 Gurevitch, K Mengersen), pp. 348–485. Princeton, New Jersey: Princeton University  
536 Press.
- 537 33. Thomsen MS, Byers JE, Schiel DR, Bruno JF, Olden JD, Wernberg T, Silliman BR. 2014  
538 Impacts of marine invaders on biodiversity depend on trophic position and functional  
539 similarity. *Mar. Ecol. Prog. Ser.* **495**, 39–47. (doi:10.3354/meps10566)
- 540 34. Christensen MR, Graham MD, Vinebrooke RD, Findlay DL, Paterson MJ, Turner MA.  
541 2006 Multiple anthropogenic stressors cause ecological surprises in boreal lakes. *Glob.*  
542 *Chang. Biol.* **12**, 2316–2322. (doi:10.1111/j.1365-2486.2006.01257.x)
- 543 35. Nielsen KJ. 2003 Nutrient loading and consumers: Agents of change in open-coast  
544 macrophyte assemblages. *Proc. Natl. Acad. Sci.* **100**, 7660–7665.  
545 (doi:10.1073/pnas.0932534100)
- 546 36. Bracken MES, Nielsen KJ. 2008 Diversity of intertidal macroalgae increases with  
547 nitrogen loading by invertebrates. *Ecology* **85**, 2828–2836.
- 548 37. Arévalo R, Pinedo S, Ballesteros E. 2007 Changes in the composition and structure of  
549 Mediterranean rocky-shore communities following a gradient of nutrient enrichment:  
550 Descriptive study and test of proposed methods to assess water quality regarding  
551 macroalgae. *Mar. Pollut. Bull.* **55**, 104–113. (doi:10.1016/j.marpolbul.2006.08.023)
- 552 38. Proulx M, Mazumder A. 1998 Reversal of grazing impact on plant species richness in  
553 nutrient-poor vs. nutrient-rich ecosystems. *Ecology* **79**, 2581–2592. (doi:10.1890/0012-  
554 9658)
- 555 39. Kraufvelin P, Moy FE, Christie H, Bokn TL. 2006 Nutrient addition to experimental  
556 rocky shore communities revisited: Delayed responses, rapid recovery. *Ecosystems* **9**,  
557 1076–1093. (doi:10.1007/s10021-005-0188-1)
- 558 40. Forrest J, Arnott SE. 2006 Immigration and zooplankton community responses to nutrient  
559 enrichment: A mesocosm experiment. *Oecologia* **150**, 119–131. (doi:10.1007/s00442-  
560 006-0490-4)
- 561 41. Herbert DA, Fourqurean JW. 2008 Ecosystem structure and function still altered two  
562 decades after short-term fertilization of a seagrass meadow. *Ecosystems* **11**, 688–700.  
563 (doi:10.1007/s10021-008-9151-2)
- 564 42. Isbell F, Reich PB, Tilman D, Hobbie SE, Polasky S, Binder S. 2013 Nutrient enrichment,  
565 biodiversity loss, and consequent declines in ecosystem productivity. *Proc. Natl. Acad.*  
566 *Sci.* **110**, 11911–6. (doi:10.1073/pnas.1310880110)
- 567 43. Simberloff D, Holle B Von. 1999 Positive interactions of nonindigenous species:  
568 invasional meltdown? *Biol. Invasions* **1**, 21–32. (doi:10.1023/a:1010086329619)
- 569 44. Wonham MJ, Carlton JT. 2005 Trends in marine biological invasions at local and regional  
570 scales: the Northeast Pacific Ocean as a model system. *Biol. Invasions* **7**, 24.  
571 (doi:10.1007/s10530-004-2581-7)
- 572 45. Drake JM, Lodge DM. 2004 Global hot spots of biological invasions: evaluating options  
573 for ballast-water management. *Proc. R. Soc. B Biol. Sci.* **271**, 575–580.  
574 (doi:10.1098/rspb.2003.2629)

- 575 46. Sax DF, Gaines SD. 2003 Species diversity: from global decreases to local increases.  
576 *Trends Ecol. Evol.* **18**, 561–566.
- 577 47. Byrnes JE, Reynolds PL, Stachowicz JJ. 2007 Invasions and extinctions reshape coastal  
578 marine food webs. *PLoS One* **2**, e295. (doi:10.1371/journal.pone.0000295)
- 579 48. Jackson ST, Sax DF. 2010 Balancing biodiversity in a changing environment: extinction  
580 debt, immigration credit and species turnover. *Trends Ecol. Evol.* **25**, 153–160.  
581 (doi:10.1016/j.tree.2009.10.001)
- 582 49. Sagarin RD, Barry JP, Gilman SE, H. C. 1999 Climate-related change in an intertidal  
583 community over short and long time scales. *Ecol. Monogr.* **69**, 465–490.
- 584 50. Masuda R. 2008 Seasonal and interannual variation of subtidal fish assemblages in  
585 Wakasa Bay with reference to the warming trend in the Sea of Japan. *Environ. Biol.*  
586 *Fishes* **82**, 387–399. (doi:10.1007/s10641-007-9300-z)
- 587 51. Stuart-Smith RD, Barrett NS, Stevenson DG, Edgar GJ. 2010 Stability in temperate reef  
588 communities over a decadal time scale despite concurrent ocean warming. *Glob. Chang.*  
589 *Biol.* **16**, 122–134. (doi:10.1111/j.1365-2486.2009.01955.x)

590

591

592

593

594

595



596 **Tables**

597

598 Table 1. AICc scores (corrected for small sample sizes) calculated for three variance-weighted  
599 meta-regressions of the log ratio of the proportion of species richness change (LR). The model  
600 which included three specific drivers: invasion potential (Inv), nutrient addition (Nut), and rate  
601 of linear temperature change (LTC) and the model that included cumulative human impacts  
602 (CHI) both performed better than the model that did not include any form of human impacts.  
603

| Model                        | Log-Likelihood | K | Deviance | AICc    | $\Delta$ AICc | Akaike weight |
|------------------------------|----------------|---|----------|---------|---------------|---------------|
| LR ~ Dur * (Inv + Nut + LTC) | -2492.09       | 7 | 5202.81  | 5004.06 | 0.00          | 1.00          |
| LR ~ Dur + CHI + Dur*CHI     | -2497.02       | 3 | 5212.67  | 5004.64 | 0.58          | 0.85          |
| LR ~ Dur                     | -2518.69       | 1 | 5256.00  | 5043.61 | 39.55         | 0.00          |

604

605

606

607

608 **Figures**

609  
610 Figure 1. (a) With increasing study duration, variance-weighted meta-regression shows that the  
611 log ratio of species richness at a rate equivalent to species richness gains of 1% per year. Studies,  
612 represented by different colours, could contain data from multiple sites and so studies were  
613 modelled as random effects. (b) Coefficient estimates for the relationship of the log-proportion of  
614 change in species richness as a function of study duration (Duration), short-term cumulative  
615 human impacts (CHI; Halpern [28]), and long-term effects of cumulative human impacts  
616 (Duration\*CHI). Points represent coefficient estimates and lines represent 95% CI obtained  
617 using a variance-weighted meta-regression.'

618  
619 Figure 2. The standardised coefficient estimates of the effect of three global drivers: nutrient  
620 addition (Nutrients), invasion potential (Invasives), and the decadal rate of linear rate of  
621 temperature change (LTC) on (a) the log-proportion of change in species richness in the short-  
622 term and (b) the effect of these drivers on the rate of change in the log-proportion of change in  
623 species richness over time. Points represent standardised coefficient estimates and lines represent  
624 95% CI obtained using a variance-weighted meta-regression.

625  
626 Figure 3. The predicted change in the log-proportion of change in species richness over study  
627 durations up to 20 years as moderated by each of the three drivers (a) nutrient addition, (b)  
628 invasion potential, (c) rate of linear temperature change when each is set to the maximum value  
629 observed in our dataset and the others are set to zero. The final plot (d) demonstrates the overall  
630 effect on the log ratio of local richness change when all three drivers are the maximum values  
631 observed in our dataset. Effects of drivers on predicted richness change (blue) are compared to  
632 the predicted change when all drivers are set to zero (grey). Predicted values regression lines and  
633 confidence intervals were obtained using a variance-weighted meta-regression from the full  
634 drivers model:  $LRR \sim \text{Duration} * (\text{nutrient addition} + \text{invasion potential} + \text{linear rate of}$   
635  $\text{temperature change})$ .

636  
637 Figure 4. Coefficient estimates of the log-proportion of change in species richness in the five  
638 most sampled taxonomic groups ( $k$ , sites;  $n$ , studies) for the model containing study duration  
639 only. Points represent coefficient estimates and lines represent 95% confidence intervals using  
640 variance-weighted meta-regressions.

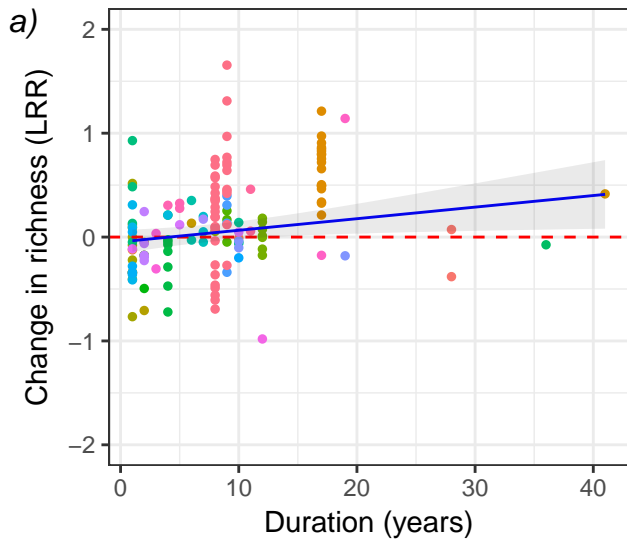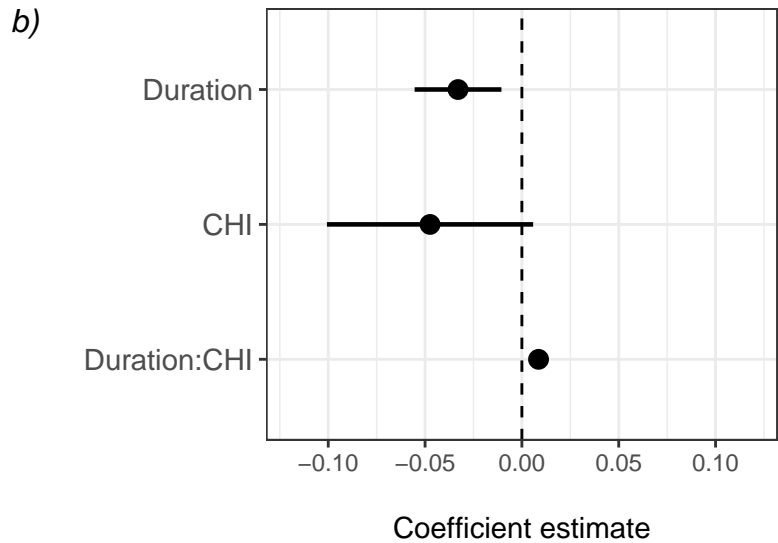

Figure 1

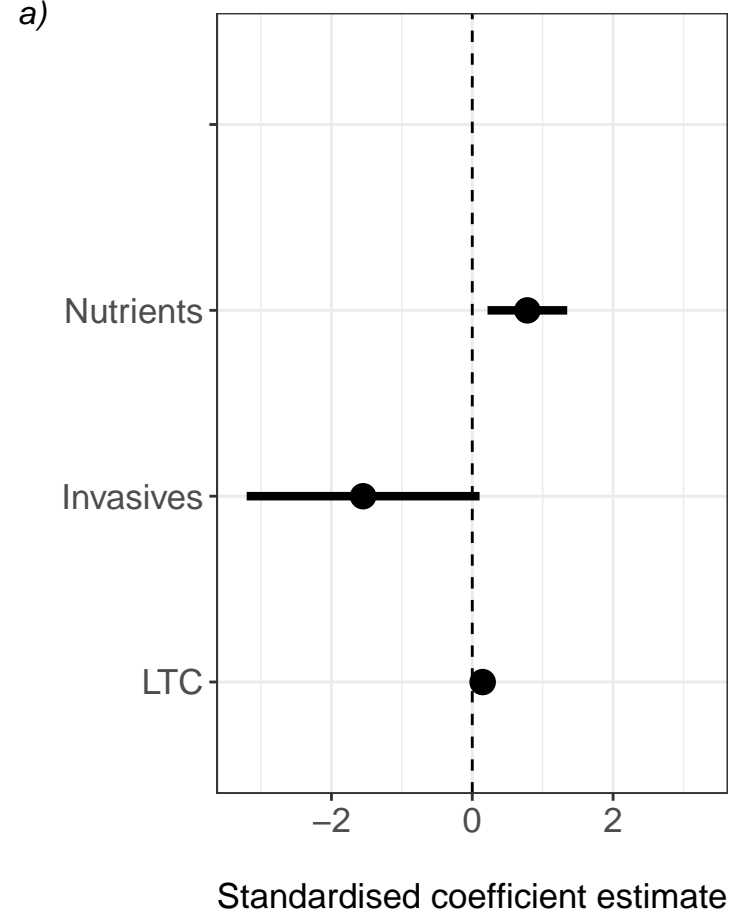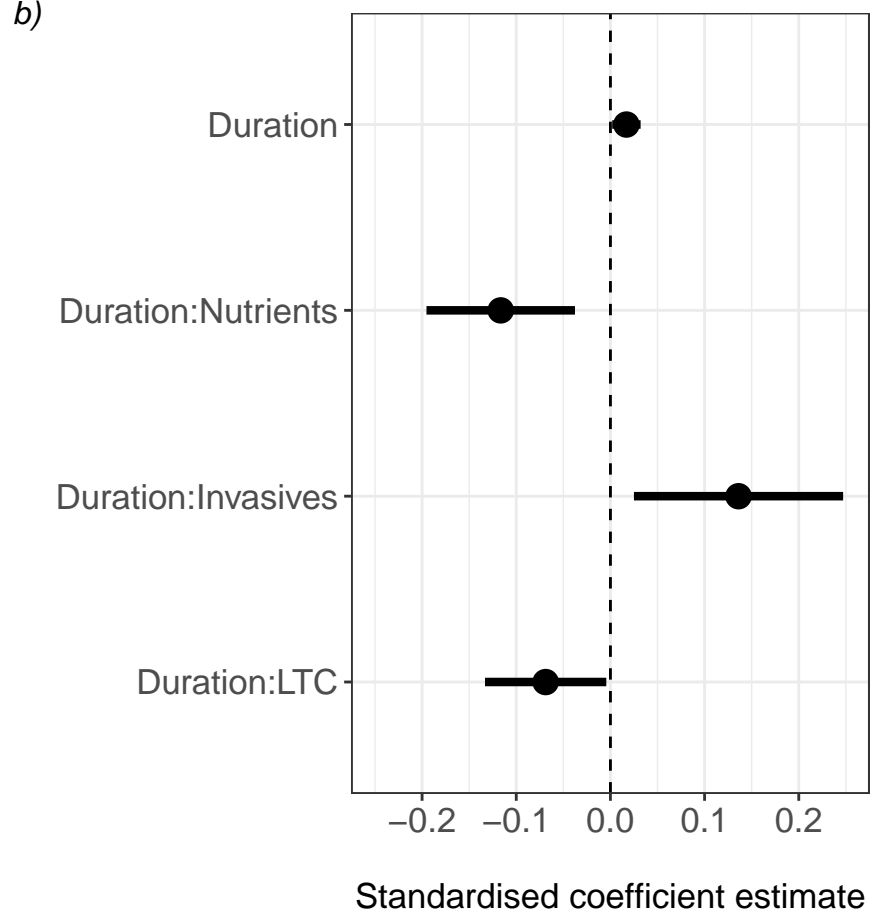

Figure 2

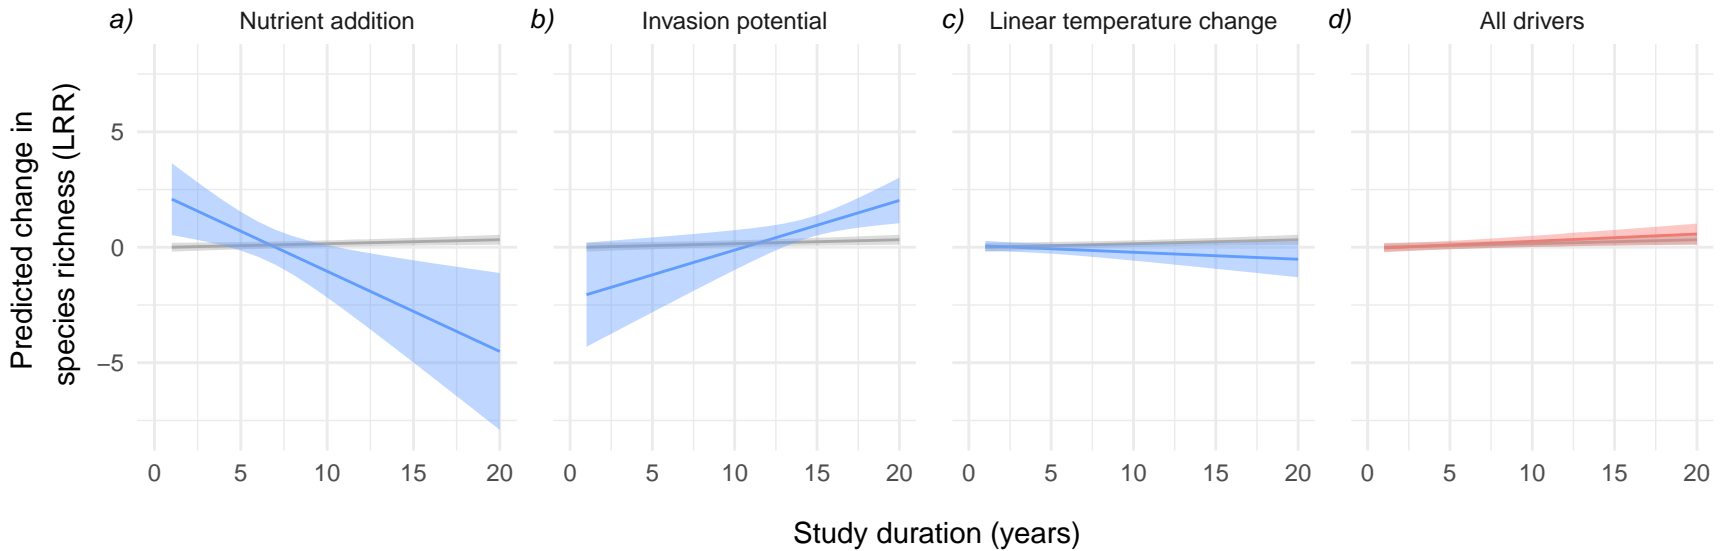

Figure 3

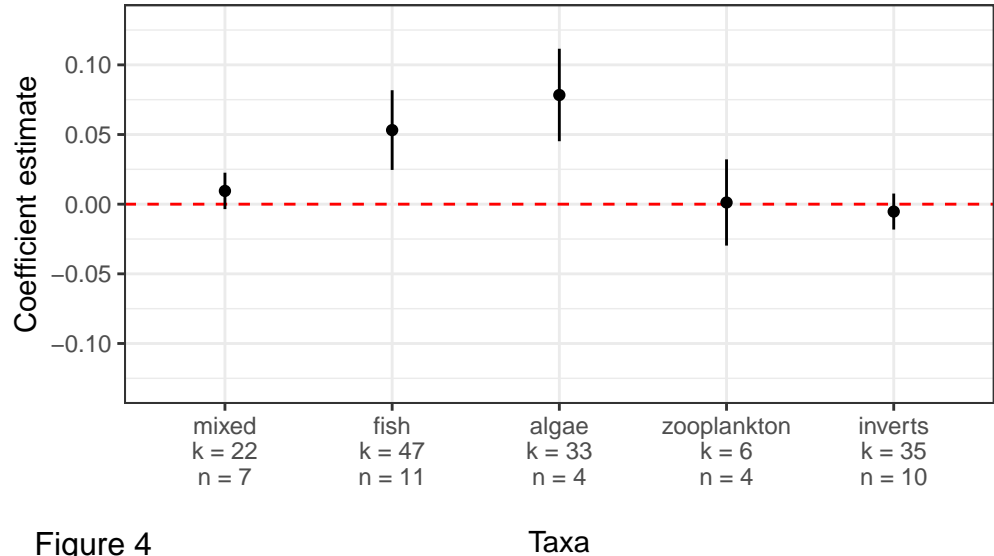

Source: http://www.biorxiv.org/content/10.1101/162362v1.full.pdf
